# Supplementary material for: Severe asthma exacerbation: Changes in patient characteristics, management, and outcomes from 1997 to 2016 in 40 ICUs in the greater Paris area
Source: PubMed Central journal article supplement — J Intensive Med. 2023 Oct 14;4(2):209–15. doi: 10.1016/j.jointm.2023.08.008 (PMC11043637; doi:10.1016/j.jointm.2023.08.008), 2023-10-14
Supplement: mmc1.pdf [file mmc1.pdf]

## APPENDIX S1

### PARTICIPATING CENTERS

HOPITAL ANTOINE BECLERE  
HOPITAL ANDRE MIGNOT  
HOPITAL AMBROISE PARE  
HOPITAL AVICENNE  
HOPITAL BOUCICAUT  
HOPITAL BICETRE  
HOPITAL BICHAT- CLAUDE BERNARD  
HOPITAL BROUSSAIS  
HOPITAL COCHIN  
HOPITAL SUD FRANCILIEN  
HOPITAL DES DIACONESSES  
HOPITAL DELAFONTAINE  
HOPITAL EUROPEEN GEORGES POMPIDOU  
HOPITAL FERNAND WIDAL  
HOPITAL DE GONESSE  
HOPITAL DE GONESSE  
HOPITAL HENRI MONDOR  
Centre HOSPITALIER SUD FRANCILIEN  
HOTEL DIEU  
INSTITUT GUSTAVE ROUSSY  
HOPITAL JEAN VERDIER  
HOPITAL LOUISE MICHEL  
HOPITAL LOUIS MOURIER  
HOPITAL LARIBOISIERE  
Centre HOSPITALIER DE MEAUX  
C.H.I LE RAINCY / MONTFERMEIL  
HOPITAL DE MONTREUIL  
HOPITAL NECKER  
HOPITAL PAUL BROUSSE  
C. Hosp. Intercom. POISSY  
HOPITAL BICHAT  
C.Hosp.Intercom. ST-GERMAIN EN LAYE  
HOPITAL PITIE-SALPETRIERE  
HOPITAL ROBERT BALLANGER  
HOPITAL RAYMOND POINCARE  
HOPITAL SAINT ANTOINE  
HOPITAL SAINT JOSEPH  
HOPITAL SAINT LOUIS  
HOPITAL TENON  
HOPITAL VICTOR DUPOUY
